# Supplementary material for: Construction of a T-cell exhaustion-related gene signature for predicting prognosis and immune response in hepatocellular carcinoma
Source: Aging (Albany NY). 2023 Jun 22;15(12):5751–74. doi: 10.18632/aging.204830 (PMC10333082; doi:10.18632/aging.204830)
Supplement: Supplementary Table 1 [file aging-15-204830-s002.xlsx]

## Sheet: TEX-related DEGs
Supplementary Table 1. The clinical characteristics of TCGA and ICGC cohorts and TEX-related DEGs included.
TCGA-LIHC	TEX-GSE125499	TEX-GSE140288
RAB4B	NKG7	PDCD1
RPL23A	CORO1A	CXCR6
ARL8B	CENPF	ICOS
MOGAT2	CTSW	IGKC
RMND5A	SH2D1A	IGLC2
RAD23A	CD3G	TNFSF9
MFSD3	KIAA0101	FCER1G
CTSA	CD3E	PLAC8
NUCB2	GZMH	FCGR3A
ST3GAL6	KLRD1	C1orf162
MTND2P28	ASPM	SPI1
ESM1	PRF1	FAM26F
AC011481.1	NUSAP1	CYBB
MT1L	LCK	LST1
MAF1	PTPRC	KLRF1
SPCS2	AC092580.4	GLUL
DESI2	COTL1	MS4A7
MT1A	XCL2	FGFBP2
FAM89B	CST7	GNLY
MED8	RUNX3	AREG
PSMB6	HCST	S100A9
HLA-DRB1	CCL4	CLEC10A
RBM15B	APOBEC3G	VSIG4
TMCO1	XCL1	FCN1
RAB5C	TRGC2	IL1B
UPP1	RGL4	IGLC3
PTPRH	CD96
FRMD8	HMMR
SMIM32	LSP1
MASP2	CD247
CAMK1	NUF2
DEFA1	KIF20B
H6PD	TYMS
GRAMD1C	IL2RG
FCGR2B	PTPN7
PHYKPL	CLSPN
PHLDA2	MAD2L1
AC138430.2	APOBEC3H
LDHA	GTSE1
RBM10	FYB
CYP4F22	CD48
ACOX2	CENPK
CYP2E1	CD69
PES1	EZH2
HSDL2	CD7
PTCD3	EMB
STARD5	PSTPIP1
DNAJC8	CASC5
FLYWCH2	TBC1D10C
LSM4	CXCR3
DDX3X	HIST1H1D
RPL41	ARAP2
MZT2A	ACAP1
IGHGP	GNG2
RECQL5	SIT1
OGDHL	CRTAM
PLOD1	PTPN22
VNN2	STK17A
RCN3	CD53
PPP4C	CD70
ALDOA	ALOX5AP
VPS18	CELF2
UQCRB	ARPC2
RNF5	H2AFV
NPIPB14P	GZMB
MPLKIP	ARHGAP30
PEMT	GBP5
MRPL22	IL2RB
UROD	TRAT1
CAPN3	DNMT1
MEP1A	SPN
AGXT2	BIN2
POGK	DHFR
BCAP29	HIST1H1E
DHX15	PRC1
RPF1	IKZF3
ATP6V0E1	GMFG
AC026470.1	RAN
RPL3P4	GZMM
AKR1C2	GPR65
EIF3I	ITGB2
LSM2	IKZF1
NIF3L1	SMC2
MMUT	RARRES3
MRPS25	SMC4
PON1	ITGA4
ZCCHC17	SLA
PRG4	CD6
MZT1	CALD1
S100A12	BCL11B
XYLT2	H2AFZ
DDX21	SEPP1
ISG20L2	TRAF3IP3
MORF4L2	HELLS
CCDC90B	PRKCB
UBE2Z	PTMA
FGFR4	HOPX
TRIM25	WIPF1
CRB3	LIMD2
TMEM30A	KIF2A
DDR1	DOCK8
NBPF9	DNAJC9
SCPEP1	SP140
ETFRF1	FAM49B
PDIA3	PYHIN1
SLPI	CNTRL
HAUS7	SELM
FP236383.3	BUB3
CHD1	HN1
SDAD1	HNRNPR
SBNO2	PDE7A
ZNF622	DOK2
SZRD1	SAMSN1
NPIPB3	EGR1
ADGRA3	EPSTI1
POLG	GPSM3
SAYSD1	ABRACL
RPL38	CFL1
ADIPOR2	APOBEC3C
ZNF664	APOC3
TYK2	NGFRAP1
PSMB5	PPP1R18
BDH1	FABP5
ARNT	ACTR3
FN3KRP	GAPDH
GCFC2	FN1
MRPL10	GPX3
NCAPH2	DUSP2
RPS2P5	DUT
ANTXR2	ARPC3
AC008608.2	CRIP2
MICOS10	LCP2
SERPINI1	GSN
UBE2J1	IGFBP7
MZT2B	STK17B
VCAM1	RHOH
LAMTOR4	S1PR4
PNMA6A	IFI16
ADAMTSL4	TFPI
RARRES1	WBP5
PSKH1	SPOCK2
CFB	TNFAIP8
CDO1	HMGN1
TNPO3	IDH2
NDUFA3	TSC22D1
AC004057.1	A2M
CPT2	ARPC5L
PI4K2A	REL
NREP	TNFRSF1B
MAFK	PARP1
RNASET2	CD37
RPS24	MBP
RPL9	GPBP1
AC011558.1	PRKCH
AKAP17A	MGP
DCAF7	MYO1F
SLC25A39	SQSTM1
EIF3H	NFIB
MINDY1	CD44
CAPN2	RHOC
C9orf78	PTRF
COQ8B	HCLS1
TSC2	CAV2
METTL22	PKIG
ZNF598	HES1
CMTM3	CCND3
ACAD8	FAM213A
NEK2	ITGAE
PCBP1	MB21D1
CTHRC1	PRKCDBP
ALDH3A1	CKS1B
C9orf16	CCL4L2
CRIP1	PDE4D
CASP4	TCF4
POLR1D	CYLD
ATF6B	44810
PHGDH	ARHGAP29
PTS	TMEM176A
FNBP4	ZNF331
TNFAIP3	ALB
CFL2	ZBTB16
SHISA4	GYPC
PBK	HNRNPA3
CIZ1	CFH
NSMCE1	NOP58
NUTM2A-AS1	CYR61
PRPF19	TINAGL1
FMO5	MBNL1
CYP8B1	HIST1H4C
ECM1	PDK4
TUBA1C	MYL9
LCAT	MEF2C
SPNS1	CCND2
HLA-DRB6	LPP
CORO1C	FNBP1
URM1	SMCHD1
AKR1C1	MAP1B
MMP11	C10orf10
APEX2	KRT8
RNA5SP216	ANXA6
ZBTB33	CBX5
AC091982.3	APOA1
TP53INP1	PPP1R14A
CREB3L3	NR2F2
SRXN1	C8orf4
RBM4	TCP1
MYO9B	JUN
MOB1A	CTSC
EPB41L4B	RBM3
LRPAP1	IRF1
VIPR1	LHFP
SPTSSA	CLEC2B
FURIN	PLK2
BCS1L	PMAIP1
NMRAL2P	EMP1
GLYCTK	GAMT
CRTAP	JAK1
LRP1	ISG20
SLC25A5	HSPG2
ENO1	BNIP3
DGKQ	KLF4
HMGCS2	ILF3
AC008549.1	FILIP1
NMRK1	SNRPD1
LINC01001	EDNRB
GANAB	RGS5
ARNTL	PRKDC
SRRM2	TERF2IP
IFITM1	HSPD1
LGALS8	NDRG1
PC	RPA3
MRFAP1L1	ADAMTS4
FKBP10	ASGR2
TRNP1	COL6A2
AC104794.4	PPP1R2
PROC	SS18L2
NDUFA9	BGN
RRP9	CTSD
CBX1	EMCN
PLOD3	CALCRL
CCDC51	ICAM2
RRAGD	NOTCH4
S100A6	HNRNPM
HGS	FLT1
UBE2Q1	HSPH1
MRPS16	JAG1
PPFIBP2	ISYNA1
F11R	PRPF38B
AL450384.2	IGFBP5
SDR39U1	ECSCR
TJP2	KLRB1
NUP210	ENG
TYSND1	ADAMTS9
MOB3A	PRRC2C
FUS	COL6A1
IFITM2	LDB2
CSNK1E	ADGRL4
CRIM1	MFGE8
IL17RC	TPPP3
PTPN18	FILIP1L
PDIA4	TPR
ESYT1	SMG1
IGKV1-33	PTPRB
ATP5PB	THBD
MTIF2	PTP4A2
TEPSIN	ANGPTL8
EGFL8	HIGD1B
DDT	PGF
AC011462.2	SLFN5
CUL1	CRISPLD2
SPCS1	CCL3
SIRT2	SPRY1
ADGRL2	HULC
PHC2
GORASP2
CBWD3
RELB
RACGAP1
ITIH2
PLIN4
RPL14
DRAIC
APOM
GADD45G
PFDN2
USP14
MMP15
IPO4
CISH
RTP3
VASP
BSCL2
PRCC
EXOC2
CTDSPL
PCBP1-AS1
RASSF7
REC8
DYNLL2
TRMT112
FOXA3
MPC1
HLA-H
SLC48A1
PCOLCE
PCK1
POLR2E
GNPDA1
IQSEC1
RPL32
AC006205.2
F10
BNIP2
NDRG3
KIFAP3
MMRN2
PEX11B
DPP3
TRMT2A
ABCB4
CSNK2B
GRINA
ASF1A
CD248
KRT16P2
AC113935.1
PBDC1
SNX7
FAM83H
SLC35F6
YIF1A
EHMT1
AC112206.2
RPL23AP42
FBP1
TNFRSF14
C1orf56
WASH9P
AGAP4
ALG5
EP400P1
FAM156A
TACO1
CDC37
N4BP2L1
PRSS53
EML4
ANO6
ALS2CL
CTBS
SELENOK
ADH4
RNA5SP334
IFT52
NRBP2
GPAA1
NPIPB15
UBTD2
UGGT1
POLR2H
HSPA5
POLR2K
MPZ
RER1
MLPH
ACSM1
CIRBP
NCOR1
EIF3D
HIGD1A
SKP1
SUOX
CXCL9
LGALS2
TBC1D17
LONP1
AKR1B10
TEF
DESI1
LEAP2
NFKBIE
HINT2
TSPAN8
APMAP
CTNNAL1
OXLD1
DEFA1B
COX6CP1
ARL2
AL162151.2
STIM1
EIF4A1
PI3
URI1
UBALD1
CCDC71L
OR2I1P
OS9
AAMDC
CLSTN1
PLSCR4
ERBB3
BLVRB
REEP6
GNAI2
SLC22A12
AC083798.2
POLR2J3
SNRPE
ST6GALNAC6
SUMO2
DEFA3
NAGK
CGREF1
HERC2P3
KIAA1191
EID1
TRIM55
SF3B5
FBLN5
ERVK3-1
P4HA1
FAM83D
NAAA
TRMT61A
FKBP8
CCDC82
SOAT2
C19orf53
TMEM14A
TANK
CYC1
SEPHS1
STX4
TMEM64
RPL37
ENO3
AFG3L1P
LAMTOR2
RHOU
DAP3
CYP2A6
DKC1
DNPH1
ADRA2C
ZNF638
TK2
EPB41L5
HPN
STK39
GBP2
FBXO25
TMEM181
LAMTOR5
TSPAN33
C5orf51
SAA4
JUND
HMCES
TOB1
DSP
RAB4A
CYP39A1
SDC3
PAEP
NUDT7
SLC25A27
ZYX
MT-ATP6
PPIA
SDCBP
BLZF1
SORL1
QDPR
LGR4
RBM38
ODAM
AKAP9
EDF1
PAGE4
SPPL2B
NR2C1
GDF2
NDN
SELENOO
MRPS36
ALYREF
HNRNPL
ACSM2A
SERTAD3
ARL1
COX7C
ERP44
PPIE
SMAP2
SRF
LTB
SLC6A8
SULT1A3
MICAL3
CHMP4C
AKIRIN2
SUN2
SYNPO
DDB1
MSRB2
ALDH1B1
PSMB4
ERCC5
GPR107
REX1BD
AC008655.1
CYBC1
CENPB
ZBTB48
NFKBIL1
SLC39A11
JPT2
MIR3682
DSN1
EGLN2
ATP5PO
ERAP2
MATR3
SMIM15
TIMMDC1
PDXP
UQCRFS1
EFHD1
SLC37A4
SMYD2
OBSL1
LINC01093
DAD1
ZACN
RPIA
KAT5
ECH1
CCDC71
TNK2
EIF3F
CPM
NSUN2
MYO1C
DCAF12
ATAD3B
CDC42
ZNF777
EIF4EBP3
CRADD
NFS1
ZHX2
UBE2D2
TNKS1BP1
TBCAP1
APRT
DHCR7
MYL12B
USP34
GDA
TAF1C
HSD17B7
GABARAP
PTP4A1
LETMD1
DCTN1
AL445524.1
USF1
ADH1A
HLA-DPB1
CDH5
TMEM160
TMEM259
NDUFB5
INTS7
CALM2
TRA2B
SAFB2
SLC29A1
FAM3B
RPL27
AADAC
MRPL40
CPD
CDV3
C2orf72
VIL1
PMPCB
PRXL2B
PYM1
GGT5
YWHAE
RPL13
ADNP
FLAD1
SNAPIN
BPNT1
ANKRD11
RNF181
MYDGF
TTLL3
MAGEA1
ECSIT
SDE2
RN7SL2
AURKAIP1
CDC6
NRBP1
WDR19
SIK1
ALDH3A2
PLA1A
RPS8
ARRDC1
CYP1A2
PSME3
ATP5F1A
RPS15A
CNP
GADD45GIP1
AC022149.1
TUSC2
TPP1
WDR45
CXCL14
NME2
CCDC47
CAPRIN1
COX5B
MUC20-OT1
METTL27
SART1
ST14
NFIX
BAG1
AL160408.2
SEMA4B
GAPDHP1
ELK1
CHRDL2
NDEL1
GID8
JUP
DCTPP1
NRDC
TMEM70
COPS7A
ACAD9
UGT1A6
PRMT7
CAPNS1
SNRPF
PAFAH1B3
DRG2
RNF152
FKBP4
RAF1
GTF2IP1
GLYR1
CAPN12
AAR2
FABP3
SRPRB
RABIF
ACTN4
MVK
MAGOH
EPHX2
COA7
ZMAT2
DNAJB11
TFG
MT-CO3
IL1RN
SYT7
PSMD1
NAPRT
EPDR1
PARP14
MANBAL
VAT1
CSF3R
MRPS35
STK11
MRM2
TUBG1
YJU2
FNTA
CD27-AS1
POLR2F
HEBP2
B3GALT6
MRPL38
BTF3L4P2
BCL9
ETF1
TMEM115
ETFA
WDR43
SLC31A1
RASSF3
MISP
ADSL
GTF2IP20
DOK4
MFSD5
CNOT11
SPHK2
HAMP
CYP2C18
PSMC3
MKNK1
XRCC1
ESF1
AP1B1
AKIP1
MAD2L1BP
CRTC2
CYP2D7
ANGPTL6
RPL39P40
PSMD3
AC068631.1
STOM
TMEM63B
RACK1
DPYS
TOMM20
PLIN1
CCHCR1
RPL26L1
NAMPT
SNHG17
MYL6
SHMT2
PTPN2
TMEM184B
LINC01124
SEMA4G
ORMDL1
CEPT1
SCAMP5
TREX1
AC120498.4
TMBIM4
RAP1B
CSTF2
AP003108.2
RRP1B
UNG
UPK3A
NDUFS3
SGTA
UBD
PTOV1
MPZL1
ERO1B
CLEC4G
CYCS
PLA2G12B
CCNL1
FAM120A
C8A
KHK
MICOS13
IMMP1L
PHB2
TMEM245
DPM2
RNF220
ATG4B
VAMP3
NGRN
COMMD5
TMEM50B
PEX5
USP11
UBR5
GIMAP7
SCNM1
NR1I2
CROT
RGS19
ATP5PF
COX7A2
LMBR1L
ABCD4
SAA2
UBTD1
UGCG
F5
AC012313.9
RXRB
PEPD
NOC4L
ZNF672
POLR3H
CTPS1
TXNL4A
TMEM150B
LUC7L2
BYSL
CCDC137
NR2C2AP
SCAMP2
GOLT1B
SOWAHA
ANKRD52
NOP10
TMEM33
PCTP
SMIM26
SCCPDH
SAA1
MESD
ALDH8A1
ARMC6
ACLY
MLEC
RHOT2
LINC02532
HSP90AB1
TMEM185B
GLTP
RPL22
SNX14
RPL39P3
GIT1
CBWD1
CANX
DVL3
AL157392.3
AL355338.1
GFM1
ARHGEF10L
ITSN1
TGFBR1
LRG1
TNRC18
DDX50
HSD17B10
HPS6
BANF1
TTC39C
PMEPA1
ABCA5
PARP4
PSMA2
CES4A
AL354740.1
PLD3
IARS2
AARS2
AKT2
ACAP3
HCCS
CMTM8
GCDH
PCF11
NDC80
SEC61A1
AC126755.1
ZBTB22
STEAP1
FGF19
LAMP2
UBA1
RARA
AQP3
METTL7A
RGPD6
MRPS11
METTL18
PIP4K2C
ZNF787
NSUN5P1
RPA1
TAF12
SLCO1B3
FOXA2
CCDC34
AC010422.3
OPLAH
SNRPA
PPIAP29
SRP14
MRI1
CES3
CSTF2T
SEC11C
KRCC1
EIF6
ATXN7L3B
LONP2
PYCR3
TEX261
DPH7
ACTR1B
TSN
EIF4EBP1
DEDD2
ZDHHC8
ORMDL2
SERF2
NUDT22
ACAT1
PEX19
AHCYL1
PRUNE1
ARFGEF2
PARP10
MT-TY
TDGF1
RFK
RNVU1-18
PGD
PTPN11
SLC50A1
PMM2
PJA2
AC104794.3
FAM91A1
AL590133.2
UQCRH
USP39
NAGA
STMP1
NDUFA11
CCT8
TIA1
GPX2
NDUFC1
AC138969.1
SLC35A2
FRG1
XIST
RCC2
GAR1
DHTKD1
ZNF784
RFTN1
MCCC1
YRDC
CCT7
RPS19BP1
LINC00339
R3HDM4
XRCC6
TXNDC5
TMEM14C
GAS5
REEP4
TUT4
RPS21
TRAF7
BOP1
MAMDC4
SMIM20
PHKG2
PHLDB2
BAIAP2
AHNAK
TES
PAK1IP1
ADCK5
JOSD1
CRELD2
AC009120.2
CAMTA2
SPC24
CNDP1
AC079466.1
RPL37A
TRIM31
UBE2Q2
TPRG1
POLE
MIR4435-2HG
SLC16A13
SMARCB1
PIK3C3
IGF1
POLDIP3
RPLP2
LAMB2
ORC3
CAMK2N2
FAM160B2
MPPED1
HSD17B8
FAM136A
DNAJC12
RPLP1
GPRC5C
FARSA
ARL3
RPL10P9
SNN
SLC22A11
SMG1P7
BCHE
CLDN7
YWHAB
TADA3
ACSM2B
BLNK
ERH
SH3BP4
CPN2
SP1
MT1X
EIF4E
PPP4R3A
DYNLRB1
ATP11C
IFRD1
PTPRA
STAG2
CHMP4B
EIF4G2
SNHG8
SH3BP2
HERPUD1
GALNT2
COA6-AS1
MXD4
WDR46
ZNHIT2
NBPF8
DYNLT3
MRPS10
AC010507.2
TNFSF10
GALK1
CASP3
COMT
C11orf96
AC027117.2
PAPSS1
ERAP1
MTA2
MYO1E
THOC7
UGT1A3
MRFAP1
SLC2A3
PSMD6
NRSN2
TAF6L
TAB1
PIK3IP1
GOLGA8B
NEK9
PHLDA3
TESC
TUBE1
RBM23
HSBP1L1
CFI
RPRD1B
TLE3
OPTN
AC090772.4
FAM107B
UGT2B4
MTPN
CPPED1
UBE2F
B4GALT5
SLC35C1
NDUFA6
NDUFA12
CUL7
SLX1B
SPOUT1
PLIN5
TXNRD2
ITPRID2
GPR88
ANXA7
MAB21L4
FAM214A
AAMP
IL4R
TRPC4AP
INAFM1
EXOC3L4
ITPR2
AL031600.3
TMEM69
CENPV
HSPB8
RING1
GYS2
LEO1
SNRPGP2
ATP5F1D
TMEM41B
AZGP1P1
HPS1
RANGRF
RPL7P9
PPP2CA
MIR25
COMMD7
MTND4P20
RIPK2
AP006285.1
RND3
RPS12
RAB32
LINC02428
RETREG3
BAX
DDRGK1
UTP14A
LRRC42
AFP
CD302
YTHDF3
UQCRC2
DPH3
HLA-DMA
ALDH9A1
SSNA1
SKIV2L
APOF
DST
AKR7L
DNHD1
KLHDC10
CIR1
PIP5K1A
BEX4
ALAD
TMBIM1
AC125494.1
FAM171A1
FAHD2A
AC100810.1
COA6
TXLNA
ABHD17A
DPM3
NADK2
CDC5L
MGME1
UPK3BL1
RHOBTB1
NENF
RFC3
SESN2
SMARCC1
INO80B
ARHGAP17
DUSP9
AC068831.4
TM9SF4
RBPMS
GHDC
ZNF281
DHRS4
NOL7
PPIL1
TPRG1L
PACSIN3
AC114291.1
ARF1
HMGB1P6
BFAR
ETFDH
TRAFD1
SMPDL3A
GGT1
BMP4
PNMA1
NSUN6
TUBB2A
FRG1BP
MRPS28
AC135048.1
IGSF8
FOXQ1
SNAI2
ADH1B
HDAC3
ORMDL3
PGM3
COPB2
BAIAP2-DT
ZNF280D
CD320
AC093673.1
AC012065.3
BCAP31
AL354872.1
PCCB
ZNF524
NAXE
RPL41P1
NORAD
TMPRSS6
AC138696.2
SNX4
NTMT1
ASPSCR1
LYSMD1
NPIPP1
UBQLN1
GNPTG
VPS35
ATXN2L
TCF3
SLC6A13
DHPS
CYP4F3
BPGM
KDM8
SLC5A6
MAVS
EIF2AK1
RXRA
CYP4F12
BICC1
TGOLN2
EIF3C
FLCN
ANKRD37
PPP1R11
CASC3
ATG101
ATG16L2
POLD4
ZNF706
CLIC4
HINT1
GCSHP5
TCEAL9
PHF23
RPUSD1
PDHA1
PELP1
FP236383.2
MAGT1
SDF2L1
COQ10B
RPL21
MTND4P12
APOC1P1
HNRNPH2
NEU4
GNPAT
NDFIP1
MMP14
PI4KA
PRAME
OCRL
CYP51A1
NPIPA7
PSMD7
GOLPH3
C19orf48
LSM7
EIF4EBP2
CCDC159
ACADM
SREK1
MST1
LPCAT3
TMEM140
DHX9
ATN1
GLS2
OSTC
CLDN3
SARS2
SMARCA1
LSM10
CDT1
GSTT2B
ECHDC2
SAMHD1
HMOX2
PIK3R2
SPR
PLEKHF2
GPATCH3
TRAPPC1
AQP9
SLC30A6
SF3B2
KCTD20
REXO4
MUS81
NFKBIZ
ARMH1
UBL5
UPF1
CRYL1
RPS28
RAB10
RPS15
FZD5
RFNG
NFKB2
AC006128.1
ANPEP
CLDN4
C12orf45
DHCR24
DDX19B
PGK1
POLR2J
SCRIB
D2HGDH
BCL3
NDC1
PABPC1L
PABPN1
C11orf58
CES2
RENBP
TMEM98
INHBC
IDS
FAM114A1
DAO
HSF4
RFC4
CCDC107
LRRC45
SORBS3
ELP2
RARS2
ARMC7
ARHGEF7
FUCA1
PRPF31
NAA50
PLCXD2
HNF4A
SNU13
MRPL51
PDK2
POLR2L
FBLN2
RFC1
EIF2B4
PNPLA2
PRKAB2
ZNF410
TMEM14B
SP100
SLC9B2
SLC30A10
GUK1
DDX5
CLK1
MSI1
BTF3
CYP2C9
NMB
MTCO1P40
USP47
EMD
PSMD10
ACSF3
NCAPD2
MRM1
ITPKA
TOM1L1
PSMB10
SLC31A2
PTOV1-AS2
GLRX5
SLCO1B1
CDK5
SLC25A43
NACA
ACSF2
RTN3
ANKRD65
MRPL53
FKBP11
C1RL
SRSF4
RGL3
WDR74
AC012615.3
HNRNPK
COMMD6
TBC1D22A
SLU7
UBE2A
PDE4DIP
PGRMC2
HCG25
AC008894.2
GSTM4
BEX2
MTHFD2L
CA12
TOR1AIP2
FGGY
QPCTL
IGFALS
DEDD
OSGEP
AL355816.2
VEGFA
UBE2E1
CBS
PIGM
CALCA
UBE2M
SLC1A4
GTF2IRD2
RBBP6
CNIH4
AMPD2
SAA2-SAA4
TSTD1
ELK3
KLHDC4
STAP2
TRIAP1
PGGHG
CLPTM1L
FAM50A
EEF1A2
EML3
MAP2K1
HERPUD2
TIAL1
SCARA3
STAT2
ANKRD10
EDEM1
ELOB
MINPP1
RPS6KA4
HAX1
ZNF593
NDUFB8
TAT
AKR7A2
MTCP1
RNF31
GLRX
TSC22D2
AC010507.1
LINC01767
RAB26
TECR
IRAK2
SSR1
TDP2
C11orf98
MED29
INTS11
RNF10
GHITM
CUTA
CTNNA1
IGHV3-64D
AC073861.1
PET100
CPVL
ABCF3
ATP5IF1
CAMK2N1
NOXA1
COPS5
CHKA
RCL1
BAK1
PUF60
FYB2
UBE2L6
ATP6V0C
CDC20
CRYAA
PARP9
HEXA
HSPA13
PNRC1
MGAT2
SLC25A28
LINC01595
MDH2
AC116533.1
GSTM2
HAGH
PIR
AK2
TCEA2
VXN
SLC12A7
SERF1B
IFNGR2
MGAT4B
MCM6
NDUFB3
DVL1
AUP1
ATP5MF
LINC01002
MAPK8IP3
MALSU1
MBNL2
HECTD4
RHEBP1
PPP1R14BP3
UBQLN2
DNAJC4
ZNF512B
QSOX1
KIF4A
SLC9A3R1
NOLC1
HNRNPUL1
PGM2
AC135983.2
MIIP
CAPN15
ERMP1
TLN1
MICALL2
CCL14
KIFC3
STUB1
RPS23
SERPINA7
CD58
EBNA1BP2
LYNX1
TSG101
NDUFA13
NCOA4
TMEM219
AKAP8L
KRT23
MT-ND4L
LRCH4
NDUFA8
GPNMB
KLHDC3
SRSF1
MOV10
RRS1
TMEM37
DDAH1
LDHD
SYPL1
CCNI
SLC22A18
REEP5
MIR22HG
POLR3C
AC009630.3
IFNGR1
ACTN1
CIAO1
EIF2B5
KMO
MRPL24
AGFG2
EIF3B
NPIPA5
SDC1
THBS4
FH
UBB
SLC30A1
USP8
FCN2
PKLR
LENG1
ZW10
TCEAL4
SMAD5
PBXIP1
SLC51A
MYO1B
FAM20B
TSR2
SLC25A6
ODF3B
TM9SF2
NDUFB9
DDTL
SURF1
LINC01831
COQ4
PCSK9
C11orf52
CENPX
MFSD10
MUL1
MBNL3
CUL3
SPSB3
IFI6
PPP1CB
SRM
KLKB1
ASMTL-AS1
AP3M1
AP001043.1
SF1
RNF139
TCTN3
HKDC1
SNTA1
SNHG25
TSPYL1
AL627309.6
SMCO4
CMAS
AC012321.1
ATP6V0D1
AC125611.3
RPS20
TIMM44
LDB1
FANCF
DIABLO
UGT1A4
SSR4
GNG12
VAMP2
PIAS4
PCDHGC3
DCAF11
TMEM220-AS1
ADIPOR1
GPANK1
PXN
C7orf50
TUBA1A
SHBG
SGPL1
SFXN5
CKAP4
NPIPB5
TMUB1
IGF2
CSRP1
RGS12
BAMBI
ZNF511
TBRG1
HM13
LITAF
FBXO9
DYNLT1
AC024267.6
CEBPA
AC087393.2
FKBP9
CLK4
APOC4
TFF3
AC009022.1
HES6
COA4
CYB561D2
EPB41L1
NAP1L1
FSCN1
CTTN
TP53BP2
ZFAND6
TEN1
PDCL3
PJA1
SERINC1
HNRNPH1
ZNF189
ALDOB
SUGT1
ZDHHC5
UPB1
CD68
YPEL5
UBXN2B
PTGES
ANAPC15
SLC25A32
HS6ST1
PLXNB1
KLB
CPSF7
PDRG1
ZNF217
AL365205.1
MSRA
ANAPC5
DRG1
HADH
ABLIM3
NUB1
PPP1R3C
BROX
COMMD3
HLA-DPA1
MCRS1
MOSPD3
CALR
CCT6A
TCTA
BPIFB2
IK
RRBP1
ITFG2
SLC35B3
MT2A
GET4
GUSBP11
ARL6IP5
DHRS4-AS1
LINC01419
ARPP19
OSGIN1
TRIM16L
YWHAQ
TOP3B
TMEM9
ATP6V1G1
BCKDHA
NPEPPS
AVPR1A
GLO1
MRPL39
DUSP23
SOD1
KRT10
SPP1
UBR7
RDH10
SCGN
XPOT
SRSF11
HNRNPH3
RRP36
AKR1D1
FITM1
STK25
NUDT2
EIF4E2
INO80E
CPLX1
NBPF15
CAB39
MYO7A
MBD6
AC114546.3
PDZK1
CXorf56
HERC3
CDC26
MACF1
GOLPH3L
BRMS1
PLGRKT
SLC22A9
CCNE1
STT3A
CHMP5
SUN1
TOR1B
KRT16P1
NDUFB6
IVD
AC004918.1
CEBPA-DT
PPARG
ROMO1
LRP10
NT5DC2
USF2
BLVRA
FDX1
COX7A2L
ZNF22
CNPPD1
CDC42EP4
MYBL2
FTSJ3
ATP5MPL
TUBB6
SMN2
PERP
QTRT1
AC107983.1
DYRK1B
RAB5IF
KDM3B
RAB2A
DECR1
FRMD4A
HOGA1
AL031058.1
NICN1
UBL3
TEAD2
AMACR
TMEM63A
LIMS2
DNAJA3
ALOX12P2
DBH
STEAP4
S100P
RPL35
DOLK
RB1CC1
FBXO46
GSTK1
ACIN1
PYGB
SORT1
FPGS
IFIT3
RPP21
SLC13A5
NKIRAS2
PPP1R8
PTGFRN
IFT43
SREBF1
SRA1
BTG1
AKT1
TSEN34
ATOH8
NEIL1
GUSB
CDKN2AIPNL
CLGN
HSPB6
NUDT6
ALG8
TPT1-AS1
HSPE1
ABL1
MIR647
FHL2
CCL15-CCL14
SIL1
NANS
MFSD1
SMU1
MMGT1
DUOXA2
CLDN15
CHCHD2
RBM25
CIB1
KIF2C
AC018521.2
GNG5
LINC00313
PCCA
AC124319.1
FAM32A
DERA
KYNU
C11orf68
ZMPSTE24
MT-ND2
ATXN10
THOC2
MIR210HG
RESF1
PYURF
MRPL11
CRK
LPAL2
PRR15L
COX7B
RNASEK
DHX58
MON2
RPL31
NBL1
RECQL4
ATP6V1A
GBA2
GNAS
AC092718.4
CCDC97
PTPRF
SNX3
TMEM129
HTRA1
DCAF4L2
PROX1
RPL41P5
PRDX5
AC129492.1
MT-CO1
DECR2
CRNKL1
AL161787.1
LAMB3
B4GAT1
EXOSC5
POFUT2
NFKBIB
AIFM2
WSB2
ZNHIT1
SHF
AARSD1
TMX2
MRRF
PSMC1P5
SWAP70
ANKZF1
TRMT12
TMEM54
LAD1
LRRC59
SLC39A7
MOGAT3
NRAS
MRPL15
KIAA1522
ACSL1
PLEKHF1
MTCH1
PITHD1
PTDSS1
ERLEC1
AGRN
PPP2R5A
HSD17B2
GALT
ACACB
HPCAL1
TSFM
FAHD1
RAB11B
COPZ1
APOA5
HTATIP2
TMBIM6
THUMPD3-AS1
NQO2
TRMT1
AC132217.1
PLGLB2
APBB3
SNORD14A
CCNA2
JCAD
TMEM256
AJUBA
PAK2
SHOC2
FGFR3
CSAG1
FLNC
PHKA2
RPA2
TMED4
ROGDI
RPL10
ATXN2
SMIM12
RPS13
ENOSF1
EMC6
AC073869.1
XPNPEP2
AKIRIN1
CERK
LOXL4
TMEM167B
MRPL58
SMUG1
LRRFIP2
TRIM28
SEL1L
SLC25A10
LINC00942
MTFR1L
SMIM30
HDGFL2
ELOVL1
SLC25A13
ZBTB7B
DOCK6
AP2B1
SRP9
PIGR
SMIM11B
[truncated: 2,928 more rows]

## Sheet: ICGC-clinical
Characteristic	levels	Overall
n		260
stage, n (%)	Stage I	40 (15.4%)
	Stage II	117 (45%)
	Stage III	80 (30.8%)
	Stage IV	23 (8.8%)
age, median (IQR)		69 (62, 74)

## Sheet: TCGA-clinical
Characteristic	levels	Overall
n		377
Gender, n (%)	FEMALE	122 (32.4%)
	MALE	255 (67.6%)
Grade, n (%)	G1	55 (14.6%)
	G2	180 (47.7%)
	G3	124 (32.9%)
	G4	13 (3.4%)
	unknow	5 (1.3%)
Stage, n (%)	Stage I	175 (46.4%)
	Stage II	87 (23.1%)
	Stage III	3 (0.8%)
	Stage IIIA	65 (17.2%)
	Stage IIIB	9 (2.4%)
	Stage IIIC	9 (2.4%)
	Stage IV	2 (0.5%)
	Stage IVA	1 (0.3%)
	Stage IVB	2 (0.5%)
	unknow	24 (6.4%)
T, n (%)	T1	185 (49.1%)
	T2	93 (24.7%)
	T2a	1 (0.3%)
	T2b	1 (0.3%)
	T3	45 (11.9%)
	T3a	29 (7.7%)
	T3b	7 (1.9%)
	T4	13 (3.4%)
	TX	1 (0.3%)
	unknow	2 (0.5%)
M, n (%)	M0	272 (72.1%)
	M1	4 (1.1%)
	MX	101 (26.8%)
N, n (%)	N0	257 (68.2%)
	N1	4 (1.1%)
	NX	115 (30.5%)
	unknow	1 (0.3%)
Age, median (IQR)		61 (51, 69)
