# Supplementary material for: Construction of a T-cell exhaustion-related gene signature for predicting prognosis and immune response in hepatocellular carcinoma
Source: Aging (Albany NY). 2023 Jun 22;15(12):5751–74. doi: 10.18632/aging.204830 (PMC10333082; doi:10.18632/aging.204830)
Supplement: Supplementary Table 2 [file aging-15-204830-s003.xlsx]

## Sheet: GSEA.result
Supplementary Table 2. All GSEA results related to high- and low-TEXPM groups.
ID	setSize	enrichmentScore	NES	pvalue	p.adjust	qvalues
KEGG_COMPLEMENT_AND_COAGULATION_CASCADES	66	-0.690445	-2.66653	2.4047e-09	4.37655e-07	3.26532e-07
KEGG_AUTOIMMUNE_THYROID_DISEASE	24	-0.837768	-2.61225	9.27772e-09	8.44273e-07	6.29909e-07
KEGG_ALLOGRAFT_REJECTION	23	-0.83771	-2.57963	1.48372e-08	9.00123e-07	6.71578e-07
KEGG_GRAFT_VERSUS_HOST_DISEASE	23	-0.810935	-2.49718	1.83621e-07	8.35478e-06	6.23346e-06
KEGG_ASTHMA	15	-0.859876	-2.34674	3.1557e-07	1.14868e-05	8.57022e-06
KEGG_RETINOL_METABOLISM	50	-0.654349	-2.3922	1.84615e-06	5.59999e-05	4.17813e-05
KEGG_FATTY_ACID_METABOLISM	39	-0.705432	-2.44343	2.76549e-06	7.19028e-05	5.36464e-05
KEGG_VALINE_LEUCINE_AND_ISOLEUCINE_DEGRADATION	42	-0.65657	-2.28183	2.83972e-05	0.000646035	0.000482004
KEGG_PRIMARY_IMMUNODEFICIENCY	24	-0.694604	-2.16585	7.67422e-05	0.00149584	0.00111604
KEGG_GLYCINE_SERINE_AND_THREONINE_METABOLISM	28	-0.736158	-2.35223	8.21889e-05	0.00149584	0.00111604
KEGG_TYPE_I_DIABETES_MELLITUS	27	-0.730627	-2.35804	0.000102228	0.00169141	0.00126195
KEGG_DRUG_METABOLISM_CYTOCHROME_P450	56	-0.558242	-2.09698	0.000139519	0.00211604	0.00157877
KEGG_CELL_CYCLE	116	0.495421	1.89631	0.000192155	0.00269017	0.00200712
KEGG_TRYPTOPHAN_METABOLISM	35	-0.646576	-2.15121	0.00041571	0.00540423	0.00403208
KEGG_VIRAL_MYOCARDITIS	56	-0.530558	-1.99299	0.000503082	0.00610406	0.00455422
KEGG_PROPANOATE_METABOLISM	29	-0.666959	-2.1628	0.000663129	0.00712164	0.00531343
KEGG_BETA_ALANINE_METABOLISM	19	-0.703912	-2.08583	0.000665208	0.00712164	0.00531343
KEGG_PATHWAYS_IN_CANCER	253	0.391913	1.65438	0.000786933	0.00795676	0.00593651
KEGG_LINOLEIC_ACID_METABOLISM	19	-0.692571	-2.05223	0.0010939	0.0104784	0.0078179
KEGG_SYSTEMIC_LUPUS_ERYTHEMATOSUS	72	-0.484265	-1.91715	0.0012256	0.0111529	0.00832116
KEGG_NEUROACTIVE_LIGAND_RECEPTOR_INTERACTION	86	0.509618	1.83912	0.00133435	0.011249	0.00839282
KEGG_RIBOSOME	83	0.485567	1.74398	0.00135977	0.011249	0.00839282
KEGG_CHEMOKINE_SIGNALING_PATHWAY	146	-0.369778	-1.68794	0.00165965	0.0131329	0.00979838
KEGG_PRIMARY_BILE_ACID_BIOSYNTHESIS	15	-0.693702	-1.89323	0.00229915	0.0174352	0.0130083
KEGG_INTESTINAL_IMMUNE_NETWORK_FOR_IGA_PRODUCTION	26	-0.657761	-2.09269	0.00337919	0.0242105	0.0180633
KEGG_DRUG_METABOLISM_OTHER_ENZYMES	45	-0.515489	-1.83953	0.00345864	0.0242105	0.0180633
KEGG_ECM_RECEPTOR_INTERACTION	61	0.518547	1.7817	0.00367744	0.0247887	0.0184947
KEGG_ANTIGEN_PROCESSING_AND_PRESENTATION	53	-0.491284	-1.80594	0.00387448	0.0251841	0.0187898
KEGG_NOTCH_SIGNALING_PATHWAY	43	0.53608	1.74505	0.00446239	0.0280053	0.0208947
KEGG_CYTOKINE_CYTOKINE_RECEPTOR_INTERACTION	147	-0.353436	-1.60886	0.00466979	0.02833	0.0211369
KEGG_CELL_ADHESION_MOLECULES_CAMS	95	-0.401323	-1.67066	0.0052696	0.0309377	0.0230825
KEGG_NATURAL_KILLER_CELL_MEDIATED_CYTOTOXICITY	83	-0.423593	-1.72215	0.00555459	0.0315917	0.0235704
KEGG_BUTANOATE_METABOLISM	29	-0.585598	-1.89897	0.00746493	0.0411702	0.0307169
KEGG_SPLICEOSOME	124	0.405552	1.57863	0.010368	0.0554991	0.0414076
KEGG_ARACHIDONIC_ACID_METABOLISM	40	-0.522908	-1.80947	0.0113551	0.0590465	0.0440544
KEGG_PEROXISOME	75	-0.41395	-1.66432	0.0133108	0.0672932	0.0502072
KEGG_GLYCOSPHINGOLIPID_BIOSYNTHESIS_LACTO_AND_NEOLACTO_SERIES	16	0.627492	1.65487	0.0161167	0.0791575	0.0590591
KEGG_PPAR_SIGNALING_PATHWAY	59	-0.400481	-1.52562	0.0165274	0.0791575	0.0590591
KEGG_TYROSINE_METABOLISM	31	-0.53249	-1.73329	0.0199678	0.093183	0.0695234
KEGG_GLYCOSAMINOGLYCAN_BIOSYNTHESIS_KERATAN_SULFATE	13	0.660793	1.66954	0.0208881	0.095041	0.0709097
KEGG_GLYOXYLATE_AND_DICARBOXYLATE_METABOLISM	14	-0.606239	-1.62325	0.0221393	0.098277	0.0733241
KEGG_ALANINE_ASPARTATE_AND_GLUTAMATE_METABOLISM	27	-0.514551	-1.66067	0.0228771	0.0991341	0.0739636
KEGG_STEROID_HORMONE_BIOSYNTHESIS	41	-0.464933	-1.61958	0.0258027	0.109212	0.0814823
KEGG_ALPHA_LINOLENIC_ACID_METABOLISM	10	-0.66827	-1.66866	0.0290654	0.120225	0.0896994
KEGG_METABOLISM_OF_XENOBIOTICS_BY_CYTOCHROME_P450	54	-0.421831	-1.56946	0.0299704	0.121213	0.0904369
KEGG_CITRATE_CYCLE_TCA_CYCLE	29	-0.494794	-1.60451	0.0315579	0.12486	0.0931572
KEGG_PARKINSONS_DISEASE	111	-0.322094	-1.36998	0.0341368	0.132189	0.098626
KEGG_PRION_DISEASES	30	-0.471742	-1.53093	0.0355434	0.13471	0.100507
KEGG_BLADDER_CANCER	40	0.502696	1.60446	0.0365497	0.13471	0.100507
KEGG_VASCULAR_SMOOTH_MUSCLE_CONTRACTION	78	-0.349233	-1.40946	0.0370082	0.13471	0.100507
KEGG_RIBOFLAVIN_METABOLISM	13	0.624249	1.57721	0.0423977	0.150134	0.112014
KEGG_LYSOSOME	106	0.379641	1.43034	0.0428954	0.150134	0.112014
KEGG_NITROGEN_METABOLISM	16	-0.555008	-1.54567	0.0443365	0.15225	0.113593
